# Supplementary material
Source: MDPI journal article supplement (https://www.mdpi.com/2411-5142/5/2/33)
Supplement: s1 [file s1]

Table S1: Characteristics of included studies.

| Author                | Year | Country | Study Design                   | Workplace                                                   | Sample size and demographic characteristics                  | Intervention                                                                                                                                                                                                                                                                                                           | Control                                                                                                                        | Stress outcome measures                                                              | Conclusion                                                                                                                                                                                                                                                 |
|-----------------------|------|---------|--------------------------------|-------------------------------------------------------------|--------------------------------------------------------------|------------------------------------------------------------------------------------------------------------------------------------------------------------------------------------------------------------------------------------------------------------------------------------------------------------------------|--------------------------------------------------------------------------------------------------------------------------------|--------------------------------------------------------------------------------------|------------------------------------------------------------------------------------------------------------------------------------------------------------------------------------------------------------------------------------------------------------|
| Axén, et al. [24]     | 2017 | Sweden  | Quasi-experimental pilot study | Medical staff in public nursing home and home care services | 25; 51 ± 8.9 aged; only 1 man (in which group not specified) | <u>n; age; gender:</u> 13; 54 ± 8.1 aged. Gender not specified<br><br><u>Type:</u> Medical Yoga training: breathing exercises, seated exercises, seated meditation<br><br><u>Frequency and Volume:</u> 9 weeks, 3 times/week (one at work and two at home)                                                             | <u>n; age; gender:</u> 12; 47.5 ± 8.8 aged. Gender not specified<br><br><u>Type:</u> NA<br><br><u>Frequency and Volume:</u> NA | Perceived Stress Scale (PSS)                                                         | No statistical differences between groups; changes in perceived stress were found to correlate statistically to changes in perceived work ability.<br><br>Convincing unit managers to let their employee to participate in this intervention was difficult |
| Bhandari, et al. [28] | 2010 | India   | Randomized Controlled Trial    | Telephone Industry                                          | 100; 51 ± 5.5 aged; 50 male and 50 females                   | <u>n; age; gender:</u> 50; 51 ± 5.5 aged; 25 male and 25 females<br><br><u>Type:</u> Yogic interventions: selected postures, Panayams, concentrations and meditations<br><br><u>Frequency and Volume:</u> 4 weeks, daily (one hour per day - 6:30–7.30 am - except Sunday)                                             | <u>n; age; gender:</u> 50; 51 ± 5.5 aged; 25 male and 25 females<br><br><u>Type:</u> NA<br><br><u>Frequency and Volume:</u> NA | Cornel Medical Index Health Questionnaire (CMIHQ-Hindi Versions for male and female) | Significant effect of the yogic intervention to manage distress and enhance work performance                                                                                                                                                               |
| Hartfiel, et al. [27] | 2011 | UK      | Randomized Controlled Trial    | British university employees                                | 40; 39.3 aged; 4 male and 36 females                         | <u>n; age; gender:</u> 20; 40.6 ± 11.40 aged; 3 male and 17 females<br><br><u>Type:</u> Dru Yoga: flowing movement, directed breathing and relaxation techniques that included affirmation and visualization<br><br><u>Frequency and Volume:</u> 6 weeks, at least one of three 60-minute lunchtime classes per week + | <u>n; age; gender:</u> 20; 38 ± 9.58 aged; 1 male and 19 females<br><br><u>Type:</u> NA<br><br><u>Frequency and Volume:</u> NA | Inventory of Positive Psychological Attitudes (IPPA)                                 | A 6 weeks program of Yoga had substantial positive effects on the emotional well-being and resilience to stress                                                                                                                                            |

|                       |      |        |                                                                                                    |                                                    |                                                   |                                                                                                                                                                                                                                                                                                                                                  |                                                                                                                                                                                                          |                                                                                                |                                                                                                                                                                                                         |
|-----------------------|------|--------|----------------------------------------------------------------------------------------------------|----------------------------------------------------|---------------------------------------------------|--------------------------------------------------------------------------------------------------------------------------------------------------------------------------------------------------------------------------------------------------------------------------------------------------------------------------------------------------|----------------------------------------------------------------------------------------------------------------------------------------------------------------------------------------------------------|------------------------------------------------------------------------------------------------|---------------------------------------------------------------------------------------------------------------------------------------------------------------------------------------------------------|
|                       |      |        |                                                                                                    |                                                    |                                                   | guided 35-minute home practice session                                                                                                                                                                                                                                                                                                           |                                                                                                                                                                                                          |                                                                                                |                                                                                                                                                                                                         |
| Hartfiel, et al. [29] | 2012 | UK     | Randomized Controlled Trial                                                                        | British local government authority employees       | 59; aged 25-64 years; 6 male and 53 females       | <p><u>n; age; gender:</u> 33; 46.1 ± 11.5 aged; 4 male and 29 females</p> <p><u>Type:</u> Dru Yoga: flowing movement, directed breathing and relaxation techniques that included affirmation and visualization</p> <p><u>Frequency and Volume:</u> 8 weeks, 50 minutes of session each week + 20 minutes DVD for home practice, twice a week</p> | <p><u>n; age; gender:</u> 26; 43.6 ± 11.5 aged; 2 male and 24 females</p> <p><u>Type:</u></p> <p><u>Frequency and Volume:</u> NA</p>                                                                     | Perceived Stress Scale (PSS)                                                                   | An 8 weeks program of Yoga resulted in significant reduction in stress and back pain, and improved psychological well-being                                                                             |
| Lin, et al. [26]      | 2015 | Taiwan | Single-blind, parallel-arm, Randomized Controlled Trial                                            | Mental Health professionals in a teaching hospital | 60; 30 years average aged; 12 male and 48 females | <p><u>n; age; gender:</u> 30; 32.07 ± 7.54 aged; 4 male and 26 females</p> <p><u>Type:</u> Yoga classes: slower warm-up exercises, forced abdominal breathing, meditation, bodily stretching positions</p> <p><u>Frequency and Volume:</u> 12 weeks, 60 minutes of session each week</p>                                                         | <p><u>n; age; gender:</u> 30; 29.77 ± 6.89 aged; 8 male and 22 females</p> <p><u>Type:</u> Free teatime in which they watched television and did not exercise</p> <p><u>Frequency and Volume:</u> NA</p> | Work related stress scale derived from the Chinese version of work-related stress scale by Lan | The professionals in the yoga group experienced a significant reduction in work-related stress and a significant enhancement of stress adaption                                                         |
| Wolever, et al. [25]  | 2012 | USA    | Randomized Controlled Trial<br><br>Multicentric trial with more than 2 arms: Yoga, Mindfulness (at | Employees of a national insurance carrier          | 143; 42.9 average aged; 23.4% male                | <p><u>n; age; gender:</u> 90; 41.6 ± 10.1 aged; 24% male</p> <p><u>Type:</u> Viniyoga Stress Reduction program: asanas, breathing techniques, guided relaxation, mental techniques and education about starting a home practice</p> <p><u>Frequency and Volume:</u> 12 weeks, 1 hour per week</p>                                                | <p><u>n; age; gender:</u> 53; 42.7 ± 9.7 aged; 18.9% male</p> <p><u>Type:</u> Did not receive any stress management intervention.</p> <p><u>Frequency and Volume:</u> NA</p>                             | Perceived Stress Scale (PSS)                                                                   | Yoga intervention and Mindfulness intervention showed positive results compared to control group about stress reduction. No differences were detected comparing at-work vs online mindfulness programs. |

|  |  |  |                                       |  |  |  |  |  |  |
|--|--|--|---------------------------------------|--|--|--|--|--|--|
|  |  |  | work and<br>online)<br>and<br>Control |  |  |  |  |  |  |
|--|--|--|---------------------------------------|--|--|--|--|--|--|
